# Supplementary material
Source: PubMed Central journal article supplement (PMC9525472)
Supplement: 13197_2022_5462_MOESM4_ESM.pdf [file 13197_2022_5462_MOESM4_ESM.pdf]

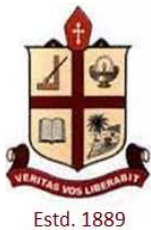

# Research and PG Department of Chemistry ST. THOMAS' COLLEGE

(Autonomous)

THIRISSUR - 680 001, KERALA, INDIA

(Affiliated to the University of Calicut & Nationally Re-accredited with 'A' Grade)

Web:- <http://stthomas.ac.in>

Email:- [stcthrissur@gmail.com](mailto:stcthrissur@gmail.com)

Phone:- +91 487 2420435

Fax:- +91 487 2421510

---

February 03, 2022

**Dr. N. Bhaskar**  
**Editor in Chief**  
**Journal of Food Science and Technology**

Dear Dr. Bhaskar,

Please find attached the revised research article that I am submitting, entitled “**Development and Validation of a GC-MS Method for Analysis of Dithiocarbamate Fungicide Residues in the Spices Cardamom (*Elettaria cardamomum*) and Black Pepper (*Piper nigrum*)**”, authored by Ramesh Babu Natarajan, Ranjith Arimboor, Joby Jacob, Binumol Thankan and me, for publication in your esteemed journal, **Journal of Food Science and Technology**.

The manuscript no. JFST-D-21-01206 was revised considering the comments of the reviewers' received on 10<sup>th</sup> February 2022. Detailed summary of the changes made in response to the reviewers' comments have also been included in this submission.

I am submitting the required details about the revised research article below, as per requirements of your Journal:

- (i) Type of article submitted: Original research article.
- (ii) The total word count of the MS is 6551. Number of references: **35**, number of figures: **2**, number of tables: **4**, supplementary material files: **3**.
- (iii) This research article has not been submitted for consideration in another journal.
- (iv) **Novelty statement**
  - A quick and easy analytical method for analysis for dithiocarbamate fungicide residues, which are important in international trade regulations, was developed and validated in spices for the first time.
  - The optimized method made use of post-run, mid-column backflush technique and selected ion monitoring in GC-MS to address response stability issues posed by spice matrices, and could achieve a limit of quantification of 0.05 mg/kg, which was adequate

for assessing compliance with Codex MRLs for dithiocarbamate residues for the two spices studied, *viz.* cardamom (*Elettaria cardamomum*) and black pepper (*Piper nigrum*).

- Safety evaluation for human consumption was also carried on real samples based on incidence of dithiocarbamate residues.
- (v) The authors declare that there is no conflict of interest.
- (vi) All authors have read and approved the final draft of the MS, and all co-authors are aware of its submission to JFST including concerned authorities
- (vii) I undertake that I shall review at least three manuscripts in my area of specialization, which are submitted to JFST.
- (viii) This article is not part of a series to be published sequentially.
- (ix) Consent is given for the publication of this article in the Journal of Food Science and Technology, if accepted.

I hope that our work will be considered for reviewing and publishing in your esteemed journal. I am looking forward to hearing from you.

Very sincerely yours,

**Joby Thomas K**  
**(Corresponding author)**
